# Supplementary material
Source: PubMed Central journal article supplement (PMC5019053)
Supplement: JB.00476-16_zjb999094188so1.pdf [file JB.00476-16_zjb999094188so1.pdf]

Figure S1  
A

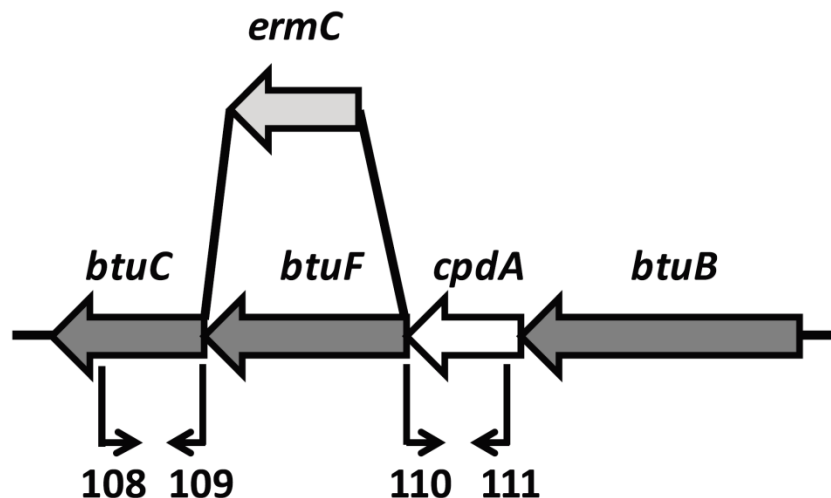

B

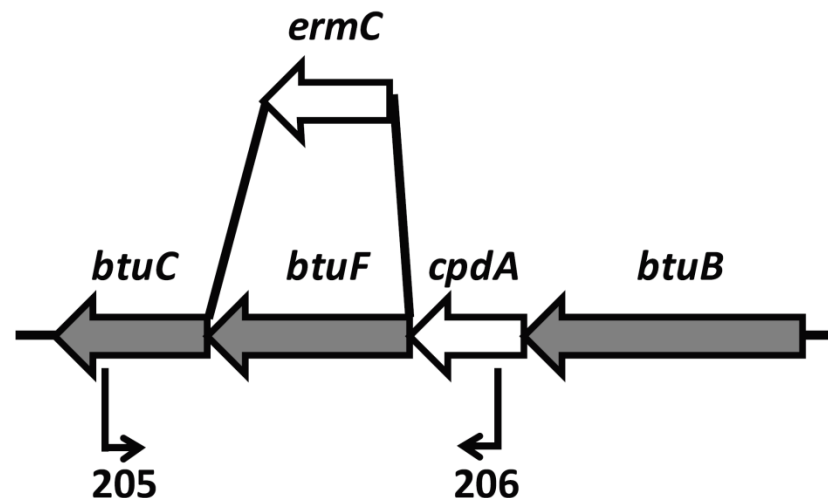

1000 bp

**Figure S1.** Scheme showing the deletion of the individual *btu* genes (*btuF* is the example shown) from *Synechococcus* sp. strain PCC 7002. A. Primers 108 and 109 were used to amplify a 659 bp upstream flanking region and primers 110 and 111 were used to amplify a 683 bp downstream flanking region of the putative *btuF* gene. The *ermC* erythromycin resistance cassette was ligated in a single ligation reaction to the upstream and downstream flanking regions after digestion. The  $\Delta btuF::ermC$  was amplified for transformation with primers 108 and 109 using the ligation mixture as template. B. The  $\Delta btuF::ermC$  construct contains upstream and downstream homologous regions of the *btuF* locus of *Synechococcus* sp. strain PCC 7002. The *ermC* erythromycin cassette was fused to the homologous flanking regions via the introduced *Nco*I and *Bam*HI sites. Primers 205 and 206 were used for screening transformants. *Synechococcus* sp. strain PCC 7002 is naturally transformable and can insert recombinant DNA via homologous recombination. The scheme used to construct the  $\Delta btuF::ermC$  mutant was similarly used to delete *btuD*, *btuB*, *btuC* and SYNPC7002\_A0636, the putative 3',5'-cyclic-nucleotide phosphodiesterase gene.

**Figure S2**

**A**

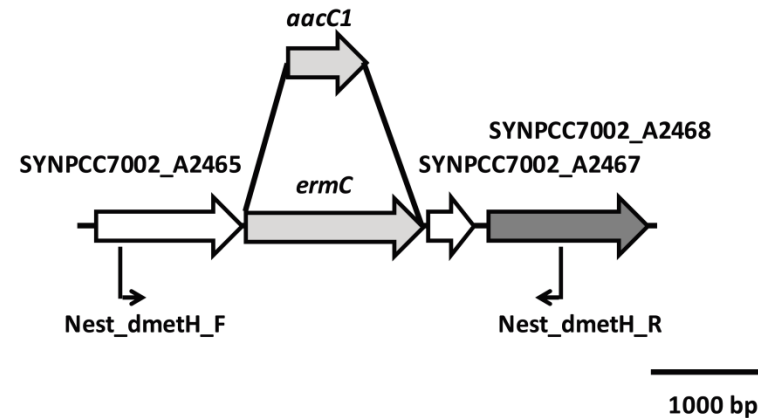

**B**

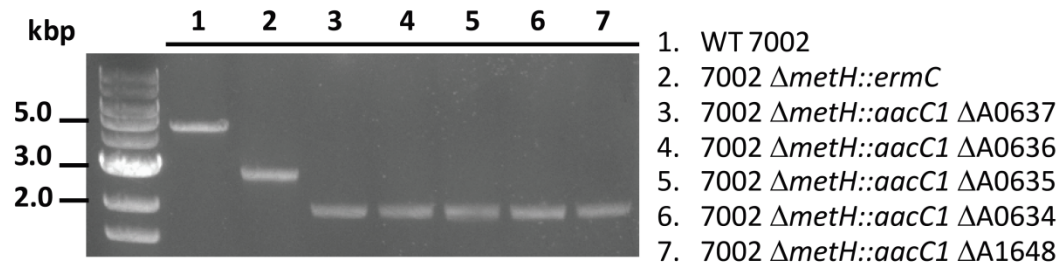

**Figure S2. A.** Scheme showing deletion of the *metH* gene by replacing the *ermC* gene of the original mutant strain with the *aacC1* gene encoding gentamicin resistance. **B.** Agarose gel electrophoresis of amplicons from the indicated strains. Deletion of the native cobalamin-dependent methionine synthase gene (*metH*) in the AAP005  $\Delta$ *btuX*::*ermC* mutants was confirmed by PCR screening. A1648: *btuD*, putative ATPase subunit of ABC transporter for cobalamin; A0634: *btuC*, permease subunit of ABC transporter for cobalamin; A0635: *btuF*, periplasmic binding protein for ABC transporter for cobalamin; A0636: 3',5'-cyclic-nucleotide phosphodiesterase (CpdA); and A0637: *btuB*, TonB-dependent cobalamin outer membrane transporter for cobalamin uptake.

**Figure S3**

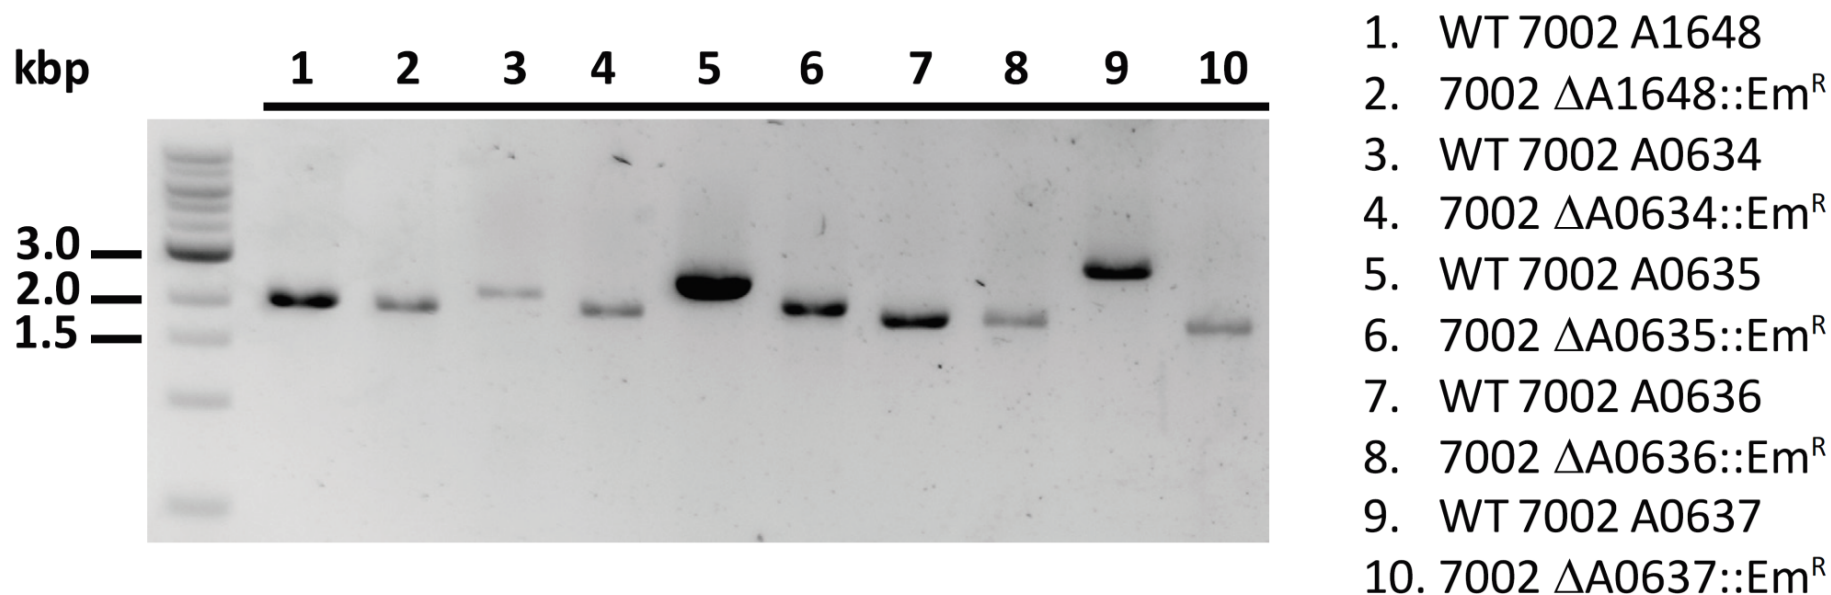

**Figure S3.** Agarose gel electrophoresis showing PCR amplicons confirming the construction of the deletion mutant strains indicated. PCR analyses using primers flanking the indicated genes show complete segregation of wild-type and mutant alleles in all cases. Identities of the amplicons were also verified by DNA sequencing. The *btu* genes from the wild type and the AAP005  $\Delta$ *btuX*::*ermC* deletion mutants were amplified using the same primer pairs. A1648: *btuD* predicted ABC transporter ATPase component; A0634: *btuC*, permease subunit of cobalamin ABC transporter; A0635: *btuF*, periplasmic cobalamin binding protein of ABC transporter; A0636: 3',5'-cyclic-nucleotide phosphodiesterase (CpdA); and A0637: TonB-dependent outer membrane transporter for cobalamin.

## Figure S4

The *btuB* gene upstream region in *Synechococcus* sp. PCC 7002 (SYNPCC7002\_A0637) and *Synechococcus* sp. JA-3-3A (CYA\_1108)

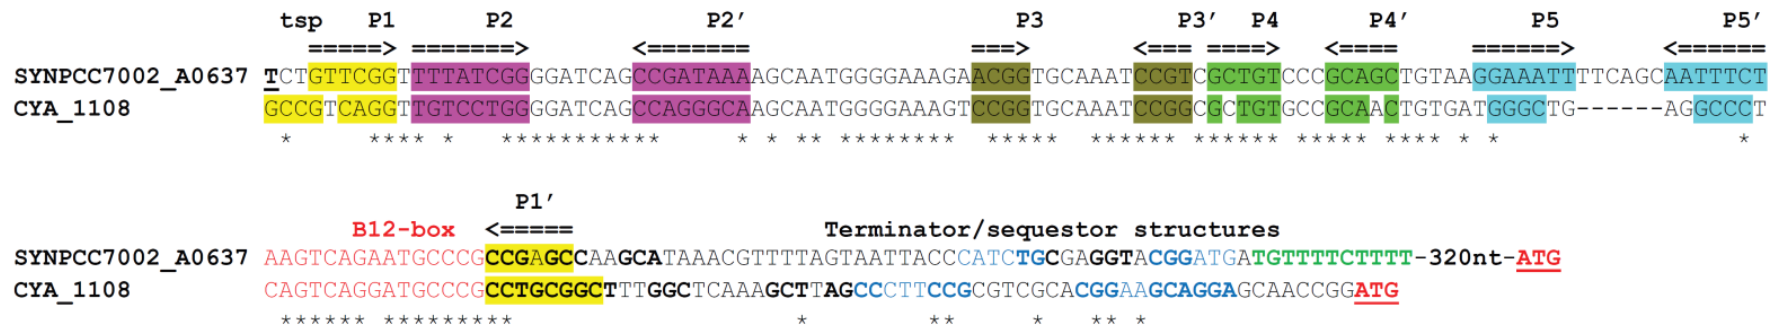

**Figure S4.** Alignment of the *btuB* gene upstream regions from *Synechococcus* sp. strain PCC 7002 (SYNPCC7002\_A0637) and *Synechococcus* sp. strain JA-3-3A (CYA\_1108) for identification of conserved RNA secondary structures of the B<sub>12</sub> riboswitch. The arrows in the upper line show the complementary stems of the RNA secondary structure. Base-paired positions are highlighted in matching colors. Conserved B<sub>12</sub>-box elements are in red. Secondary structures of putative terminators/ribosome sequesters are shown in blue, and poly-T tracts in terminators are shown in green. Start codons are shown in red and are underlined.

## Table S1

**Table S1.** Primers utilized for amplifying antibiotic markers and *methH* locus.

| Name         | Sequence                                                            |
|--------------|---------------------------------------------------------------------|
| ermC_F       | 5'-ATA TAA <u>CCA TGG</u> TAA AGA GGG TTA TAA TGA ACG AG-3'<br>NcoI |
| ermC_R       | 5'-GTA CCC <u>GGA TCC</u> TCT AGA G-3'<br>BamHI                     |
| aacC1_F      | 5'-AAA AAA <u>GAA TTC</u> CTA GAC CGA ACG CAG CGG T-3'<br>EcoRI     |
| aacC1_R      | 5'-AAA AAA <u>GGA TCC</u> CGT CGG CCG GGA AGC CG-3'<br>BamHI        |
| Nest_dmeth_F | 5'-GGG AAC TGC GCA ATA ACA AT-3'                                    |
| Nest_dmeth_R | 5'-GCC AGA TTG CCA TCG ATA AT-3'                                    |

**Table S2****A. Primers to amplify upstream and downstream flanking sites for individual *btu* gene knock-out construction**

| ID  | Name    | Sequence                                                                 |
|-----|---------|--------------------------------------------------------------------------|
| 100 | A0637AF | 5'-GCG ATC GCC TGG ATT ATT TA-3'                                         |
| 101 | A0637AR | 5'-ATG ACG <u>CCA TGG</u> AAG AAT ATT TTG GGC TAA TTT TTA ATG-3'<br>NcoI |
| 102 | A0637BF | 5'-TCC GTT <u>GGA TCC</u> CTC CGT TTC GTC CCC TAT T-3'<br>BamHI          |
| 103 | A0637BR | 5'-TGT ATT CCA GGT GGA CGT GA-3'                                         |
| 104 | A0636AF | 5'-CTA TTT TCC GGG GTT TAG CAA T-3'                                      |
| 105 | A0636AR | 5'-TGA GAA <u>CCA TGG</u> AAA ATC GTG G-3'<br>NcoI                       |
| 106 | A0636BF | 5'-TGC GTA <u>GGA TCC</u> AAA ACG ATG CGT TTC CCC TTC-3'<br>BamHI        |
| 107 | A0636BR | 5'-CTA ACA CCA CCG TTA ACC CC-3'                                         |
| 108 | A0635AF | 5'-AAC CAG ATC GGC TGA TTT TGA-3'                                        |
| 109 | A0635AR | 5'-GGA AAC <u>CCA TGG</u> TTT TTT CTC CTA CGC AAA CCA C-3'<br>NcoI       |
| 110 | A0635BF | 5'-AAA AAA <u>GGA TCC</u> CCG TGA AAA TTC CCT ACA-3'<br>BamHI            |
| 111 | A0635BR | 5'-CTG AAA AAA AGC CAG CAG TCC-3'                                        |
| 112 | A0634AF | 5'-CAA TAC CAG CGC CTT AGA TTC-3'                                        |
| 113 | A0634AR | 5'-AAA AAA <u>CCA TGG</u> TTT TCA CGG GGA ATC TTG CAA G-3'<br>NcoI       |
| 114 | A0634BF | 5'-TCG TTA <u>GGA TCC</u> CAC TAA AAA TCC AGA AAT ATT CC-3'<br>BamHI     |
| 115 | A0634BR | 5'-CTA TCG AGA TTA ATT GTT TTG GC-3'                                     |
| 116 | A1648AF | 5'-CCG ATG GTG ACC TGA ATG TTA G-3'                                      |
| 117 | A1648AR | 5'-TAC CGT <u>CCA TGG</u> CGA TCG CCT CGA TTA ATG GAG-3'<br>NcoI         |
| 118 | A1648BF | 5'-GGG TTT <u>GGA TCC</u> GTA CAG ACC CCC TGG CCA TT-3'<br>BamHI         |
| 119 | A1648BR | 5'-GGT GCG GGA ATT TAA TTT AGC-3'                                        |
| 120 | PbtuB_F | 5'-AAA AAA <u>CCG CGG</u> ATC TAT TTA CAT TGG GGG CGA T-3'<br>SacII      |
| 121 | PbtuB_R | 5'-AAA AAA <u>CCA TGG</u> AAG AAT ATT TTG GGC TA-3'<br>NcoI              |

**B. Screening primers for sequencing the individual *btu* deletion constructs using colony PCR**

| ID  | Name   | Sequence                         |
|-----|--------|----------------------------------|
| 201 | A0637F | 5'-GAC CAA CCA CGC CCA GAT TA-3' |
| 202 | A0637R | 5'-TCG CCA CCG GAG AAT TTT GA-3' |
| 203 | A0636F | 5'-ATT TAG TGC CGG AAC TGG GG-3' |
| 204 | A0636R | 5'-GGC ATC GAG GCG ATA GTT CA-3' |
| 205 | A0635F | 5'-CGG CGG TGC AAC AGT TTA AA-3' |
| 206 | A0635R | 5'-ACT GTT CCC GCT GGA TTT CC-3' |
| 207 | A0634F | 5'-TTC CTT GGG GTT AAC GGT GG-3' |
| 208 | A0634R | 5'-TCG GTG GAA ACT GGA ATC GA-3' |
| 209 | A1648F | 5'-GCC GAT GGT GAC CTG AAT GT-3' |

**Table S2. A.** Primers to amplify 600-1000 bp of upstream and downstream flanking regions for individual *btu* gene knock-out construction. Four primers were designed for each construct; two primers for the upstream flank (denoted by the letter A) and two primers for the downstream flank (denoted by the letter B). **B.** Screening primers for sequencing the individual *btu* deletion constructs using colony PCR. Primers were designed in the upstream and downstream flanking regions of the individual *btu* genes.
